# Supplementary material
Source: PubMed Central journal article supplement (PMC3043463)

PLGA-modified MSCs +  
Differentiation Media

PLGA-modified MSCs +  
Expansion Media

Adipogenic

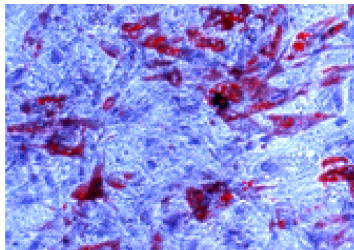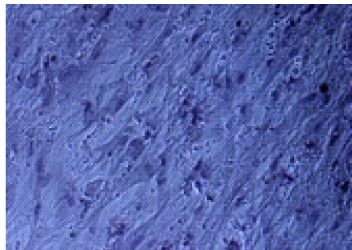

Osteogenic

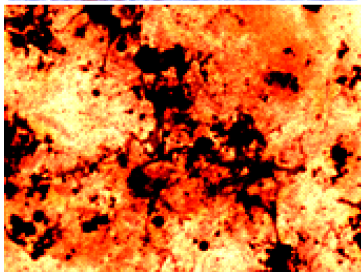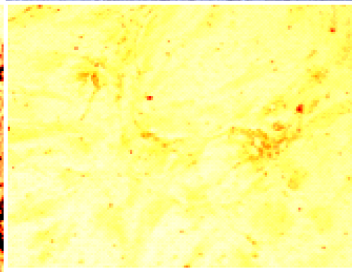

Supplement: NIHMS263583-supplement-03.pdf [file NIHMS263583-supplement-03.pdf]
