# Supplementary material
Source: PubMed Central journal article supplement (PMC3043463)

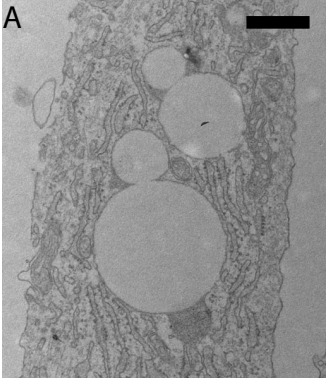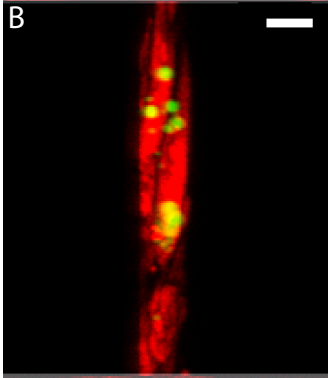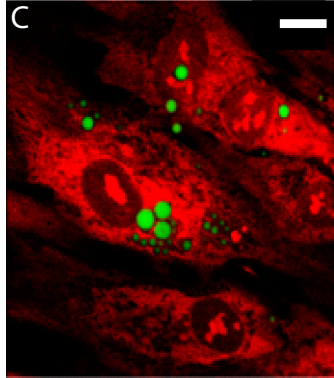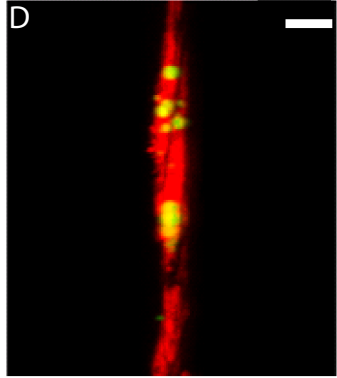

Supplement: NIHMS263583-supplement-01.pdf [file NIHMS263583-supplement-01.pdf]

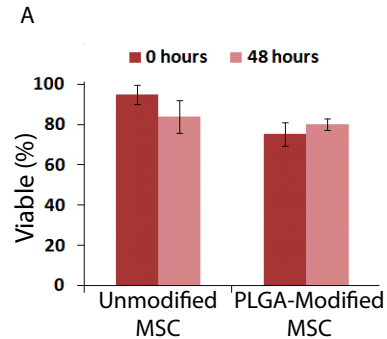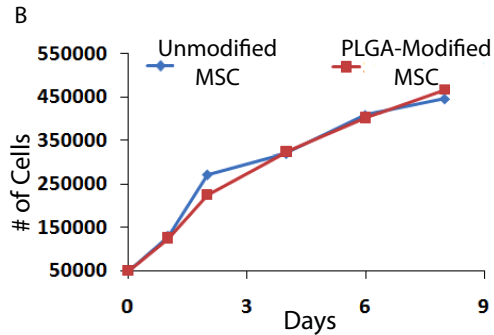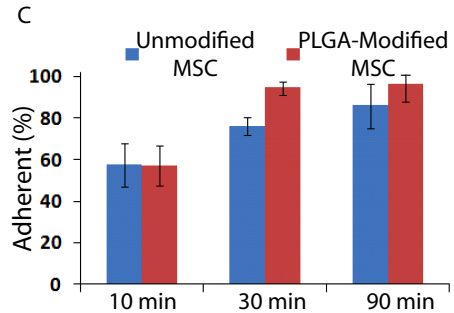

Supplement: NIHMS263583-supplement-02.pdf [file NIHMS263583-supplement-02.pdf]

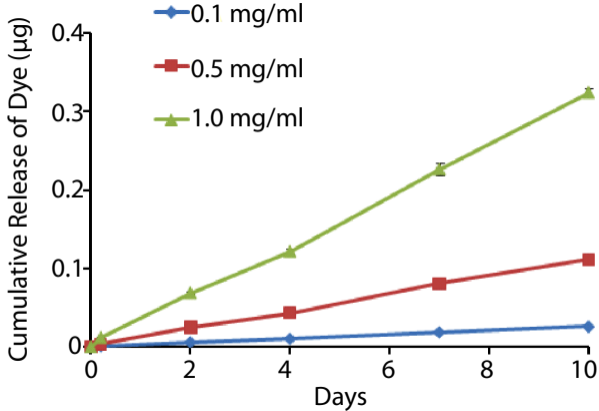

Supplement: NIHMS263583-supplement-04.pdf [file NIHMS263583-supplement-04.pdf]
